# Supplementary material
Source: publisher figshare collection journal article supplement (https://asha.figshare.com/articles/dataset/_/19611777)

**Supplemental Material S27.** Relationship between tDCS receptiveness and general receptiveness to speech-language therapy, operationalized as self-report of current therapy participation or desire for therapy.

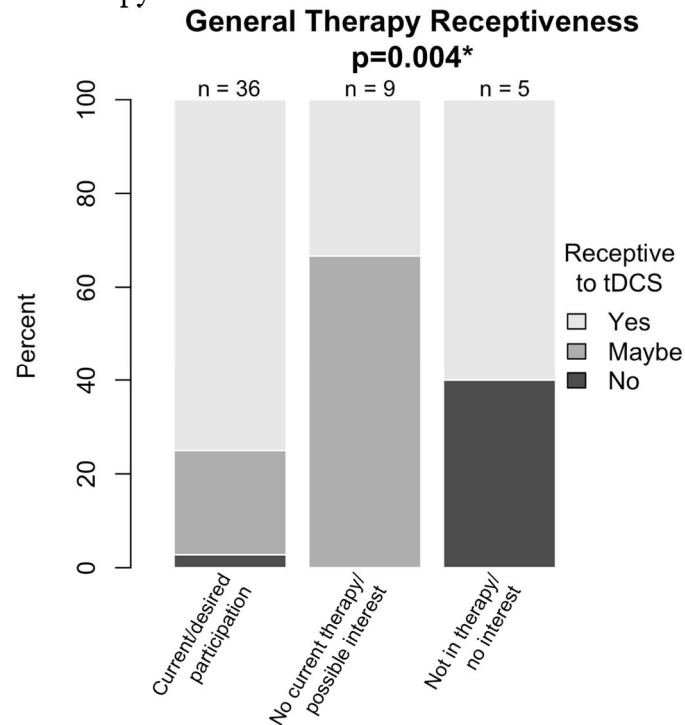

Supplement: Supplementary file 4 [file 1]
