# Supplementary material
Source: publisher figshare collection journal article supplement (https://asha.figshare.com/articles/dataset/_/19611777)

**Supplemental Material S25.** Relationship between tDCS receptiveness and presence of conditions potentially contraindicative for tDCS candidacy.

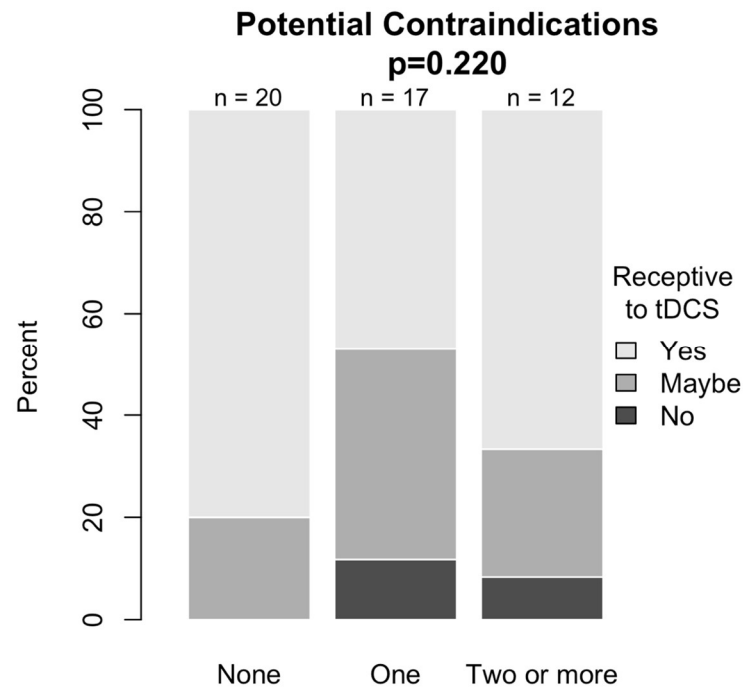

Supplement: Supplementary file 8 [file 1]
