# Supplementary material
Source: publisher figshare collection journal article supplement (https://asha.figshare.com/articles/dataset/_/19611777)

**Supplemental Material S13.** Self-reported desire to participate in speech-language therapy, for those reporting not currently being in therapy only ( $n = 29$ ).

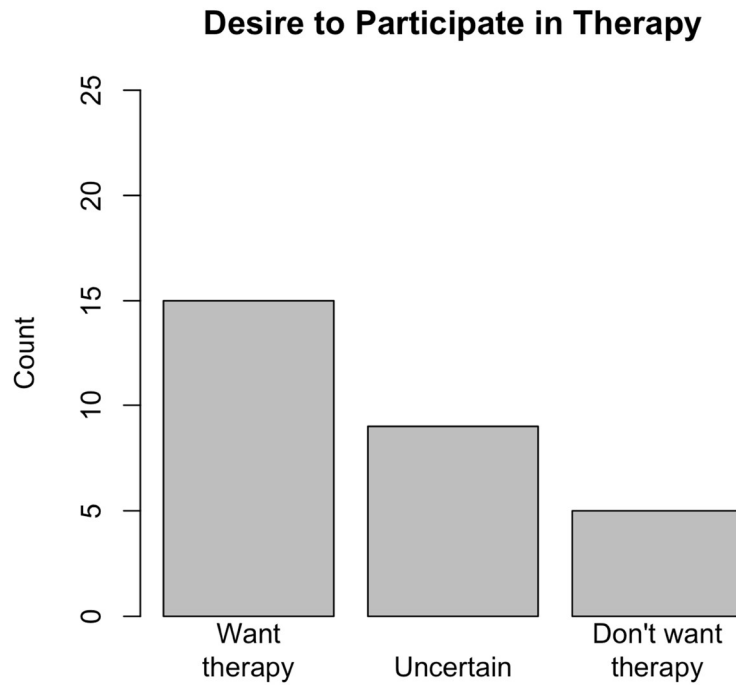

Supplement: Supplementary file 9 [file 1]
