# Supplementary material
Source: publisher figshare collection journal article supplement (https://asha.figshare.com/articles/dataset/_/19611777)

**Supplemental Material S24.** Relationship between tDCS receptiveness and current participation in speech-language therapy.

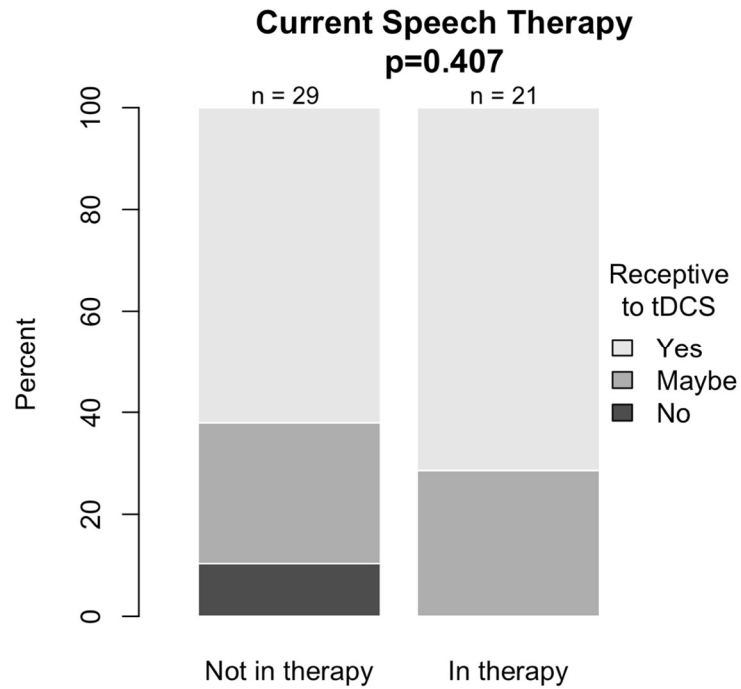

Supplement: Supplementary file 10 [file 1]
