# Supplementary material
Source: publisher figshare collection journal article supplement (https://asha.figshare.com/articles/dataset/_/19611777)

**Supplemental Material S11.** Self-reported current speech-language therapy status for the entire sample.

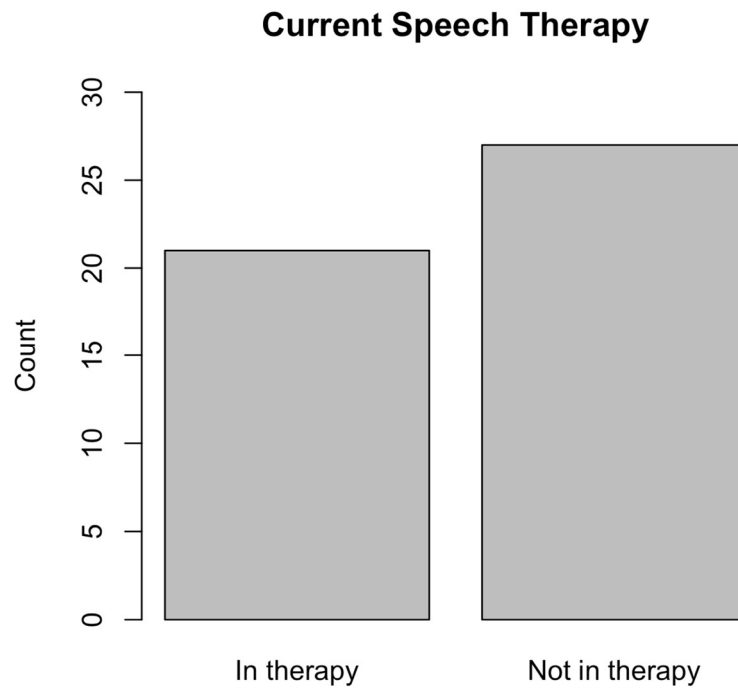

Supplement: Supplementary file 13 [file 1]
