# Supplementary material
Source: publisher figshare collection journal article supplement (https://asha.figshare.com/articles/dataset/_/19611777)

**Supplemental Material S31.** Relationship between tDCS receptiveness and the number of temporary risks an individual reported *potentially* being willing to consider (i.e., “Yes” and “Maybe” responses) if it could help their aphasia. Table 3 (main text) includes acceptable temporary risks for the sample.

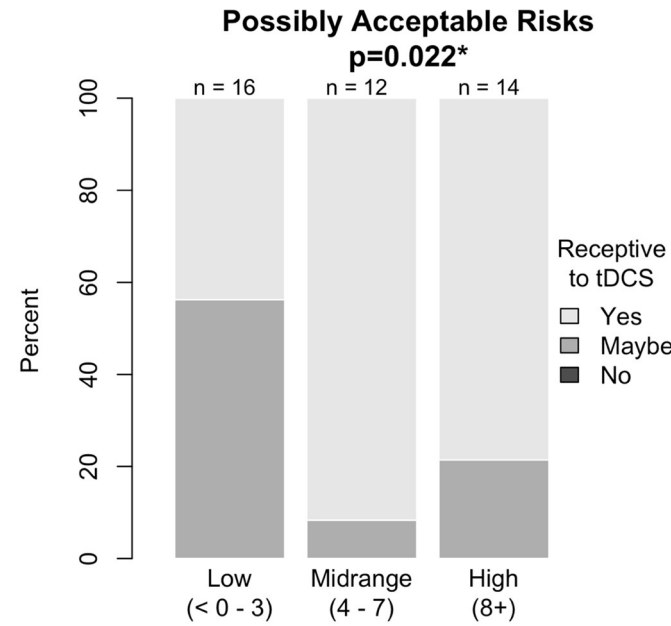

Supplement: Supplementary file 14 [file 1]
