# Supplementary material
Source: publisher figshare collection journal article supplement (https://asha.figshare.com/articles/dataset/_/19611777)

**Supplemental Material S29.** Relationship between general receptiveness to speech-language therapy (operationalized based on self-report of current therapy participation or desire for therapy) and receptiveness to concurrent performance of therapy exercises during tDCS. Note that the legend indicates receptiveness to *therapy*, rather than receptiveness to tDCS, as in all other plots.

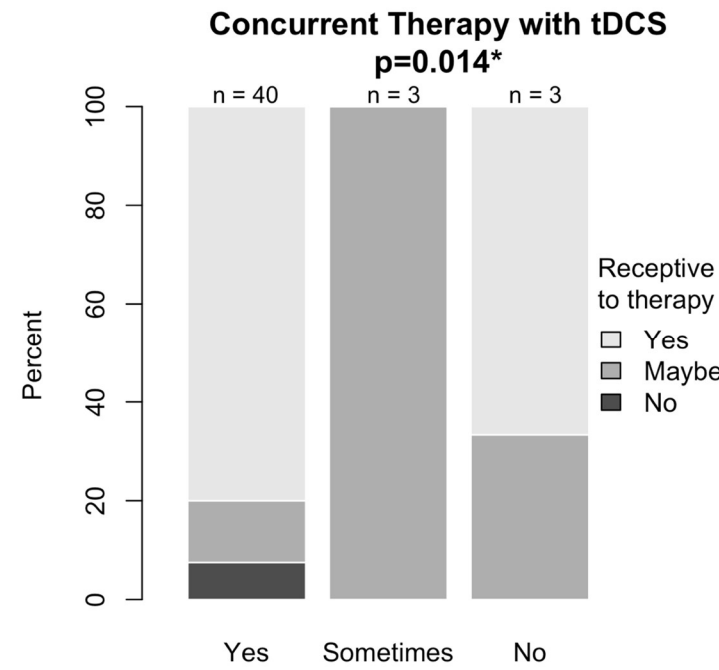

Supplement: Supplementary file 15 [file 1]
