# Supplementary material
Source: publisher figshare collection journal article supplement (https://asha.figshare.com/articles/dataset/_/19611777)

**Supplemental Material S26.** Relationship between tDCS receptiveness and self-assessment of communicative participation on the Communicative Participation Item Bank (CPIB; raw summary score). See Table 2 (main text) for list of CPIB items and summary of responses to each for the sample.

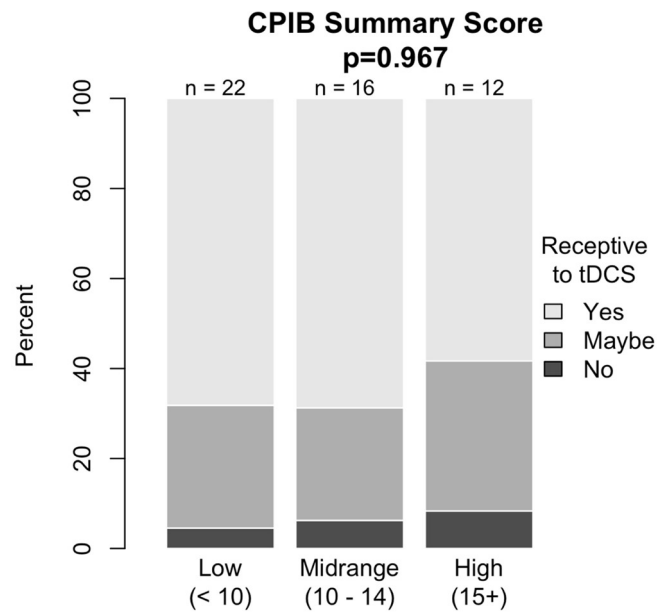

Supplement: Supplementary file 17 [file 1]
