# Supplementary material
Source: publisher figshare collection journal article supplement (https://asha.figshare.com/articles/dataset/_/19611777)

**Supplemental Material S8.** Self-reported geographic region for the entire sample. U.S. regions are from Census divisions.

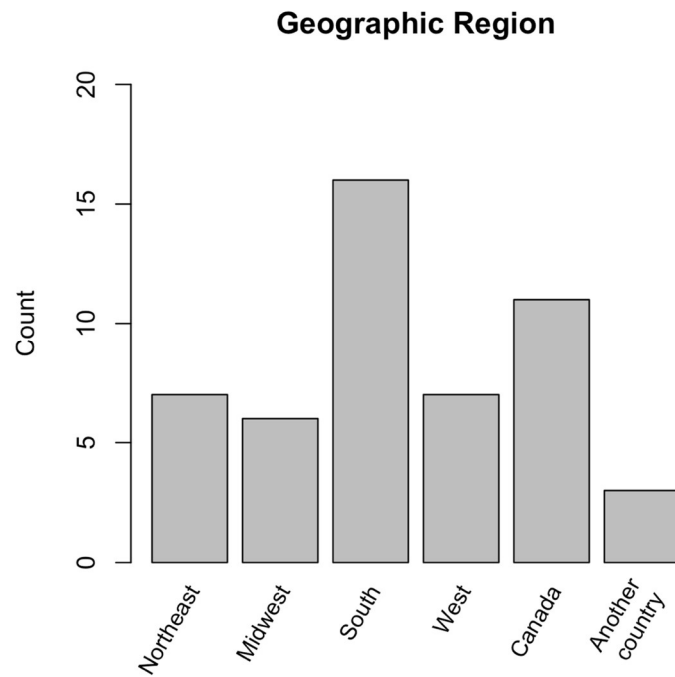

Supplement: Supplementary file 18 [file 1]
