# Supplementary material
Source: publisher figshare collection journal article supplement (https://asha.figshare.com/articles/dataset/_/19611777)

**Supplemental Material S30.** Relationship between tDCS receptiveness and the number of temporary risks an individual reported *definitively* being willing to consider (i.e., “Yes” responses only) if it could help their aphasia. See Table 3 (main text) for list of possible temporary risks and number of respondents reporting each of these to be acceptable.

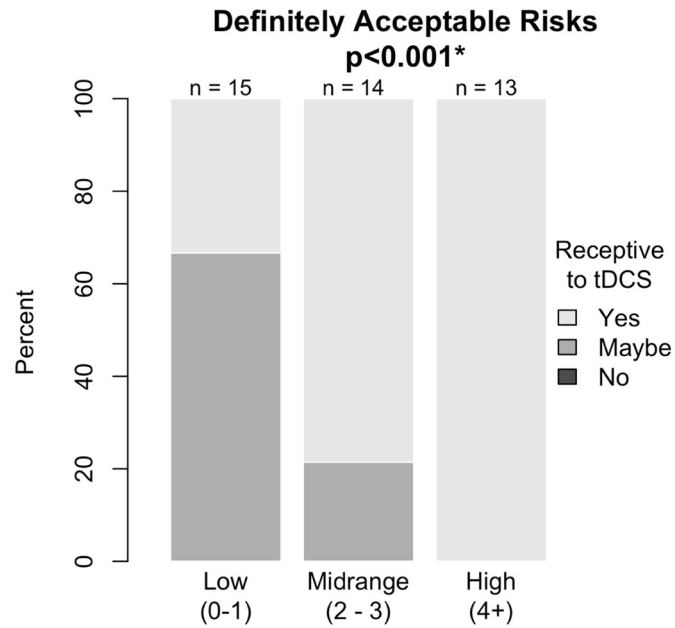

Supplement: Supplementary file 19 [file 1]
