# Supplementary material
Source: publisher figshare collection journal article supplement (https://asha.figshare.com/articles/dataset/_/19611777)

**Supplemental Material S22.** Relationship between tDCS receptiveness and time since stroke causing aphasia.

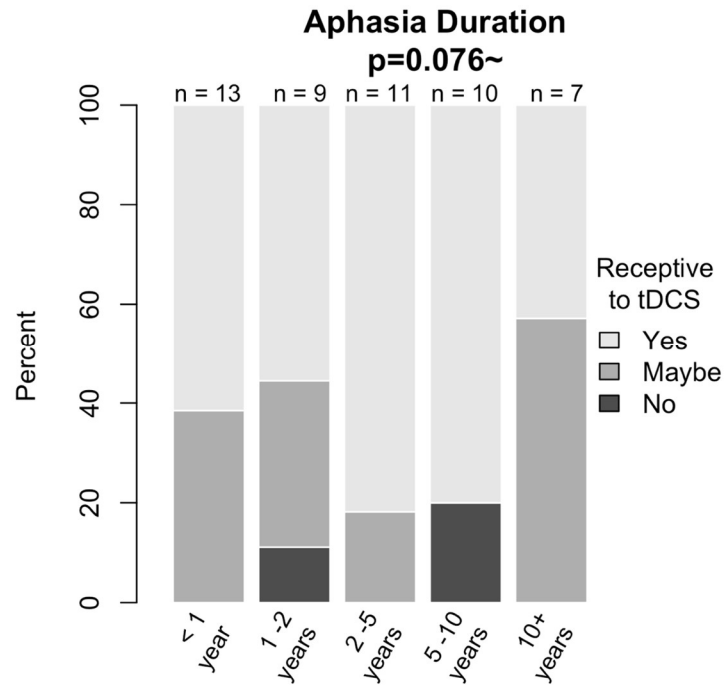

Supplement: Supplementary file 21 [file 1]
