# Supplementary material
Source: publisher figshare collection journal article supplement (https://asha.figshare.com/articles/dataset/_/19611777)

**Supplemental Material S10.** Self-reported time since the stroke causing aphasia for the entire sample.

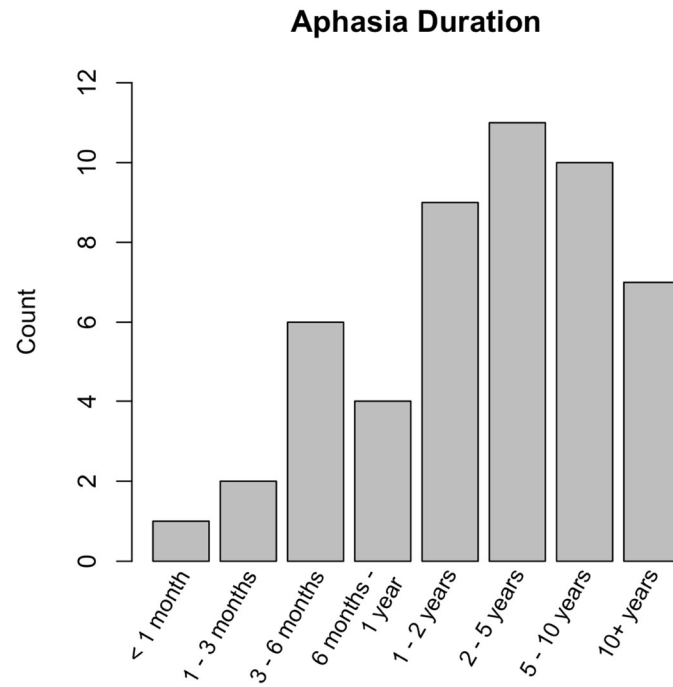

Supplement: Supplementary file 24 [file 1]
