# Supplementary material
Source: publisher figshare collection journal article supplement (https://asha.figshare.com/articles/dataset/_/19611777)

**Supplemental Material S23.** Relationship between tDCS receptiveness and history of participation in speech-language therapy.

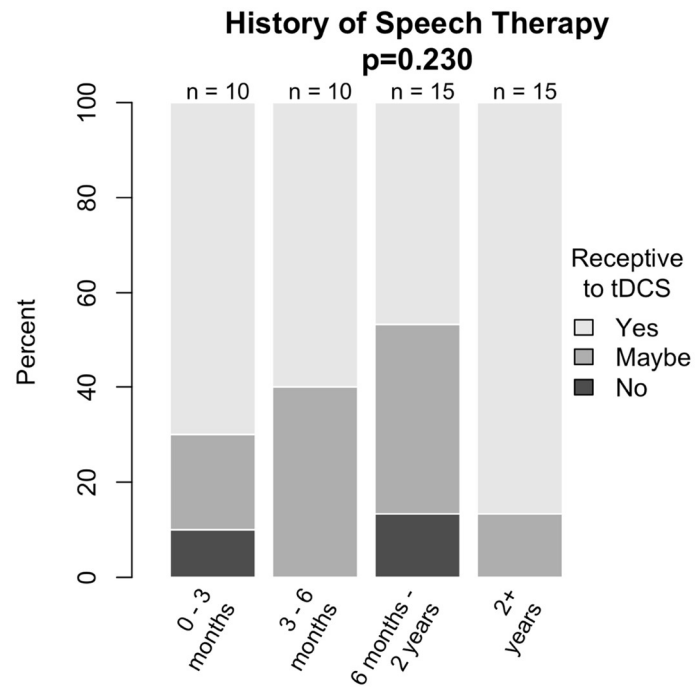

Supplement: Supplementary file 25 [file 1]
