# Supplementary material
Source: publisher figshare collection journal article supplement (https://asha.figshare.com/articles/dataset/_/19611777)

**Supplemental Material S28.** Relationship between tDCS receptiveness and receptiveness to concurrent participation of therapy exercises during tDCS.

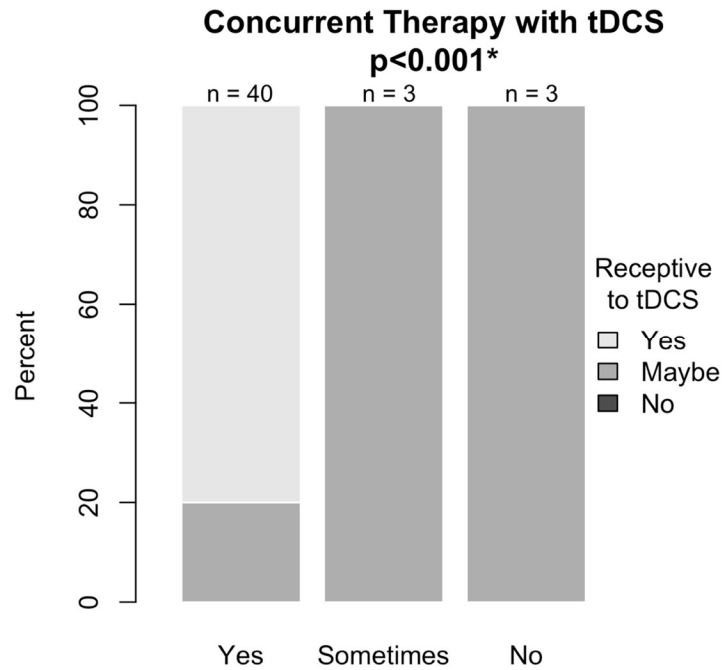

Supplement: Supplementary file 26 [file 1]
