# Supplementary material
Source: publisher figshare collection journal article supplement (https://asha.figshare.com/articles/dataset/_/19611777)

**Supplemental Material S14.** Self-reported number of conditions potentially contraindicative of status for the entire sample. See Table 1 (main text) for list of potential contraindications and number of respondents reporting each.

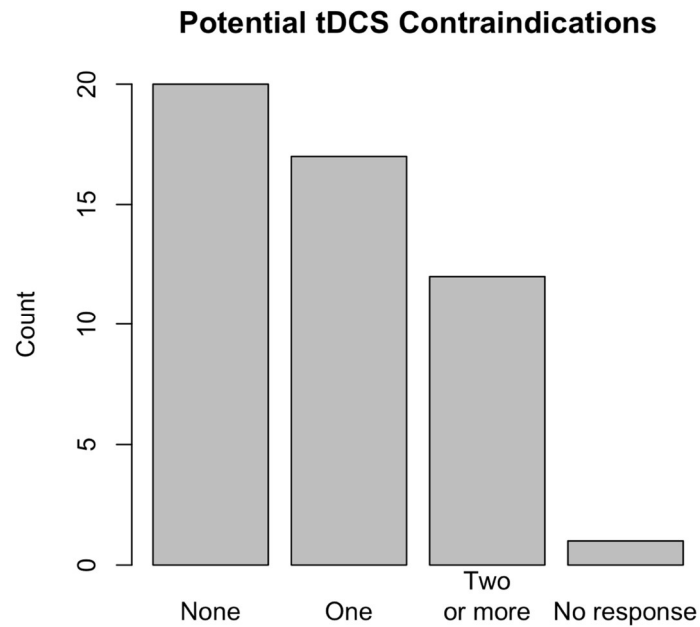

Supplement: Supplementary file 28 [file 1]
