# Supplementary material
Source: publisher figshare collection journal article supplement (https://asha.figshare.com/articles/dataset/_/19611777)

**Supplemental Material S9.** Self-reported prior stroke status (one or more strokes) for the entire sample.

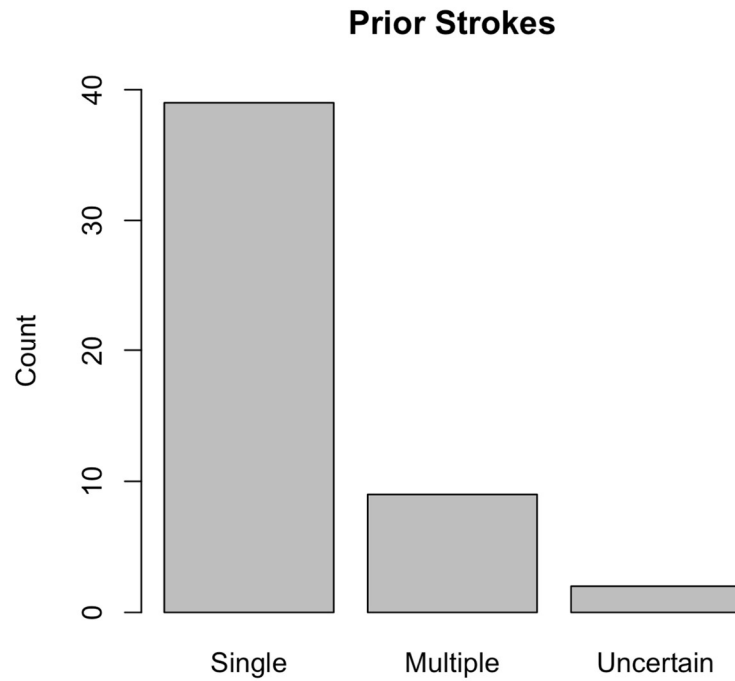

Supplement: Supplementary file 31 [file 1]
