# Supplementary material
Source: publisher figshare collection journal article supplement (https://asha.figshare.com/articles/dataset/_/19611777)

**Supplemental Material S17.** Relationship between tDCS receptiveness and race/ethnicity. Small sample sizes did not permit reporting due to confidentiality risk. White people were overrepresented (nearly  $\frac{3}{4}$  of sample), and people of the global majority were combined for statistical and reporting purposes into a BIPOC (Black, Indigenous, and People of Color) group.

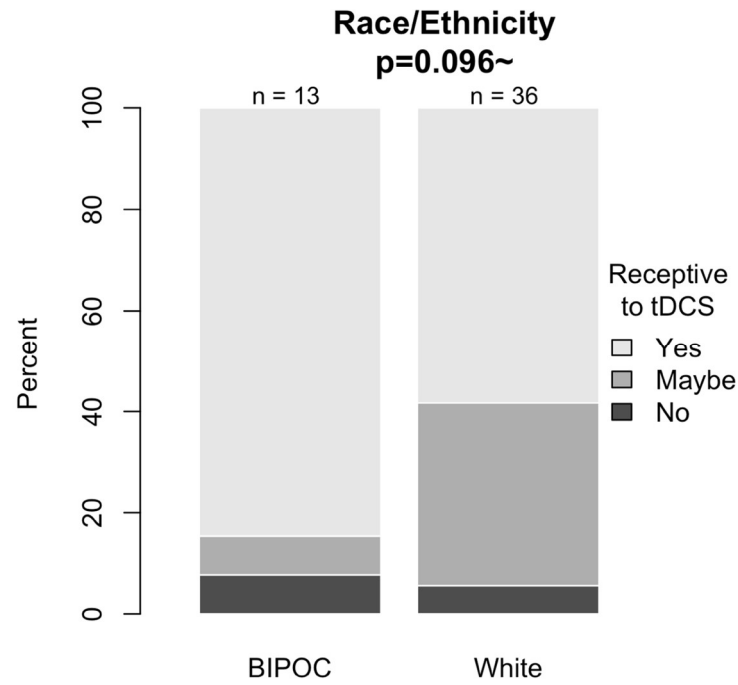

Supplement: Supplementary file 32 [file 1]
