# Supplementary material
Source: publisher figshare collection journal article supplement (https://asha.figshare.com/articles/dataset/_/19611777)

**Supplemental Material S12.** Self-reported history of total speech therapy for the entire sample.

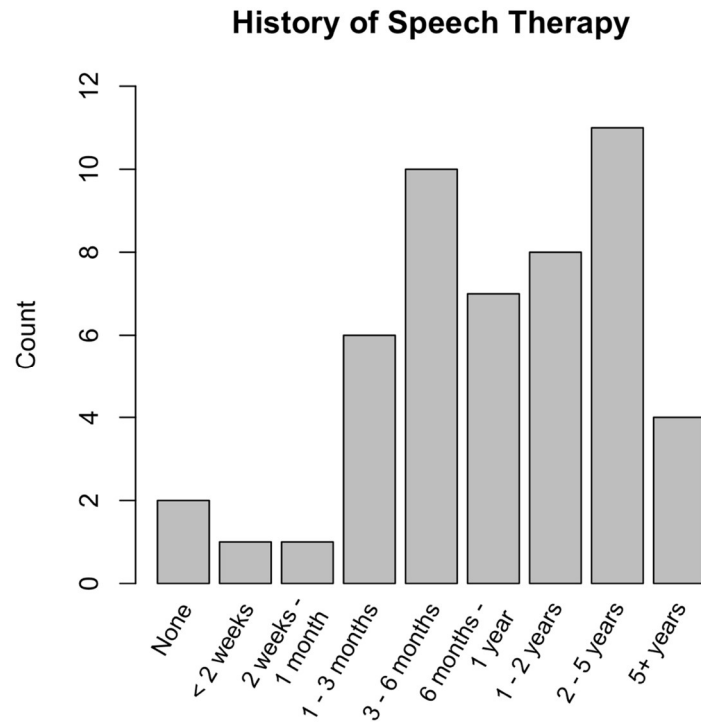

Supplement: Supplementary file 1 [file 1]

**Supplemental Material S16.** Relationship between tDCS receptiveness and age.

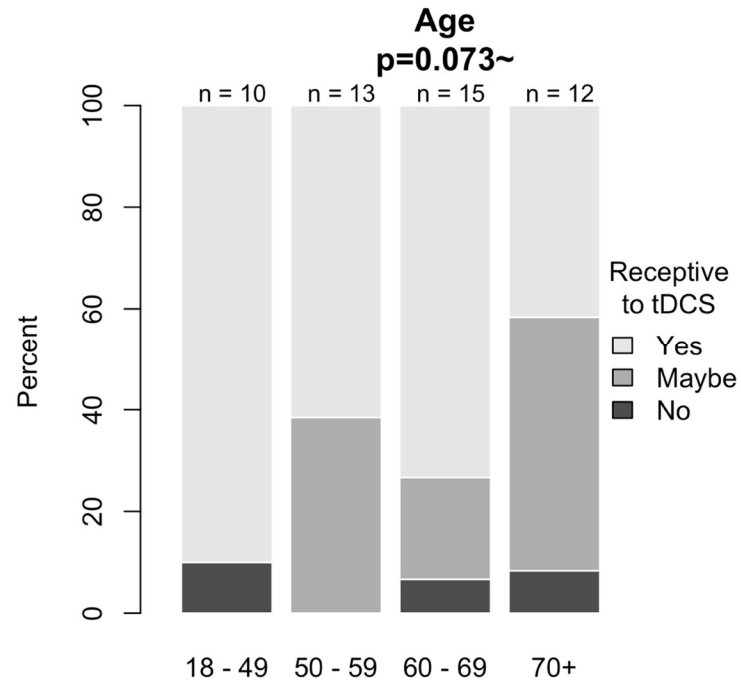

Supplement: Supplementary file 2 [file 1]

**Supplemental Material S18.** Relationship between tDCS receptiveness and education.

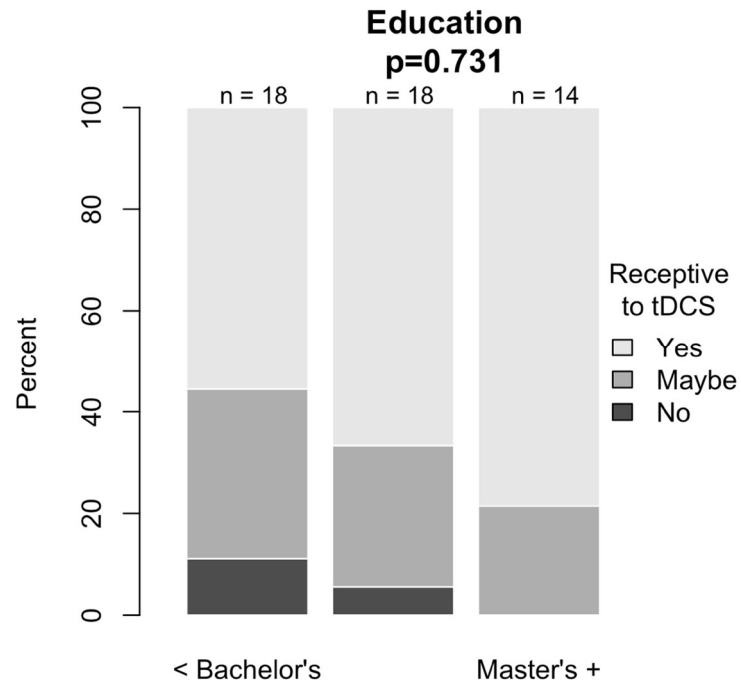

Supplement: Supplementary file 5 [file 1]

**Supplemental Material S15.** Relationship between tDCS receptiveness and sex.

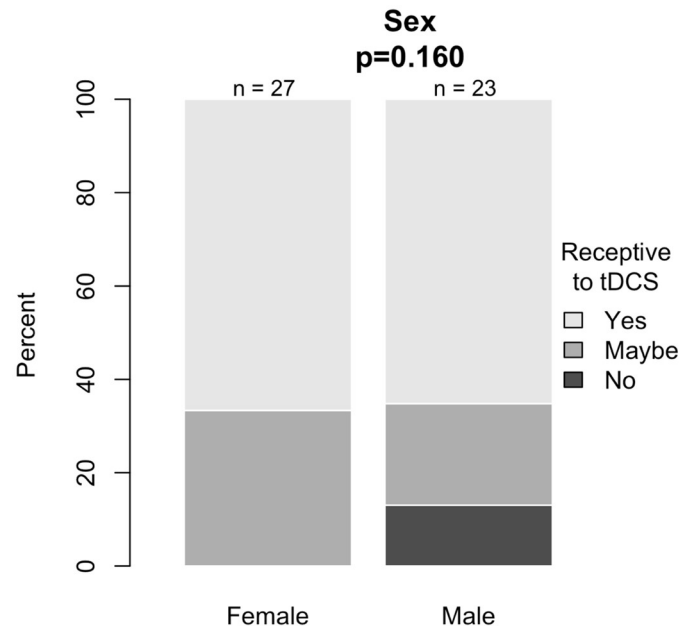

Supplement: Supplementary file 6 [file 1]

**Supplemental Material S4.** Self-reported race/ethnicity for the entire sample.

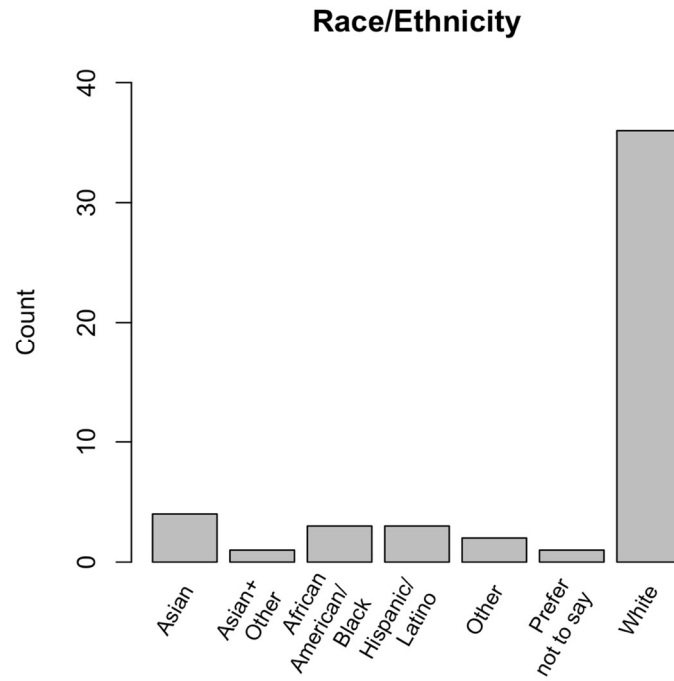

Supplement: Supplementary file 7 [file 1]

**Supplemental Material S6.** Self-reported current employment status for the entire sample.

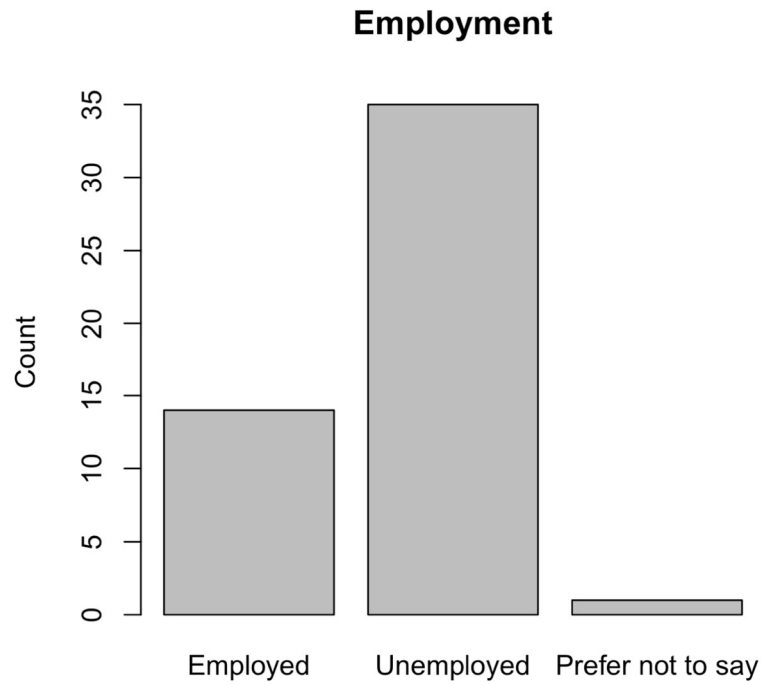

Supplement: Supplementary file 11 [file 1]

**Supplemental Material S7.** Self-reported household income brackets for the entire sample.

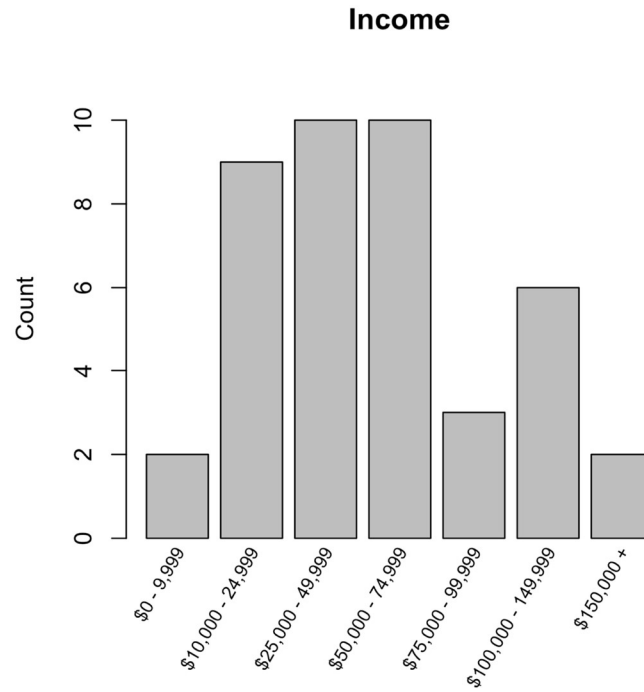

Supplement: Supplementary file 12 [file 1]

**Supplemental Material S19.** Relationship between tDCS receptiveness and income.

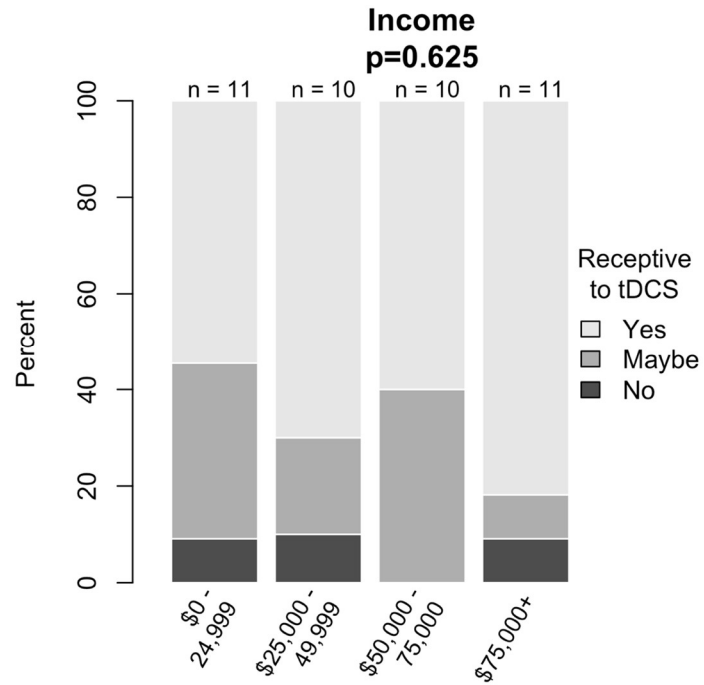

Supplement: Supplementary file 20 [file 1]

**Supplemental Material S2.** Self-reported sex for the entire sample.

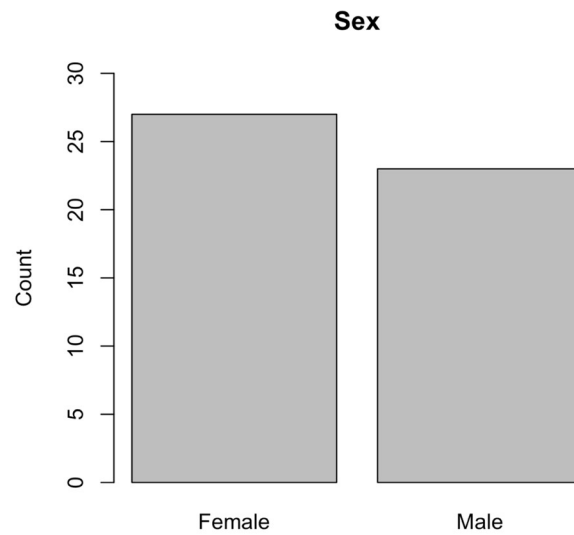

Supplement: Supplementary file 22 [file 1]

**Supplemental Material S21.** Relationship between tDCS receptiveness and prior stroke history.

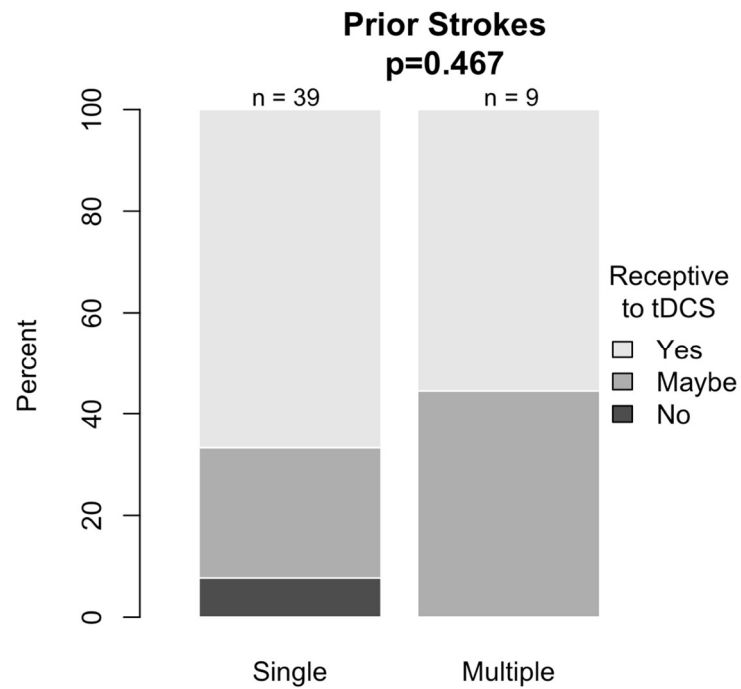

Supplement: Supplementary file 23 [file 1]

**Supplemental Material S3.** Self-reported age brackets for the entire sample.

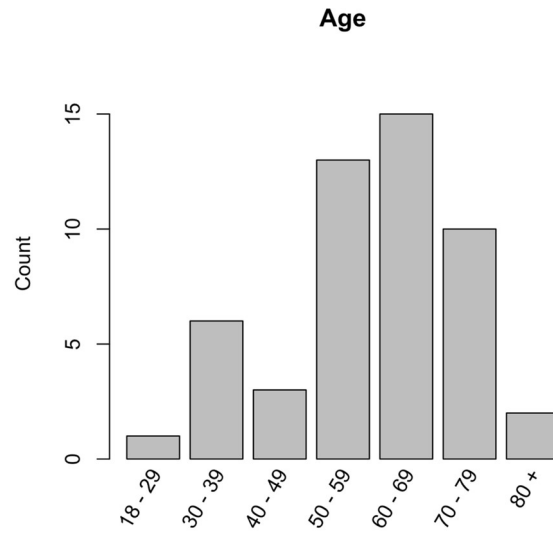

Supplement: Supplementary file 29 [file 1]

**Supplemental Material S5.** Self-reported highest level of education for the entire sample.

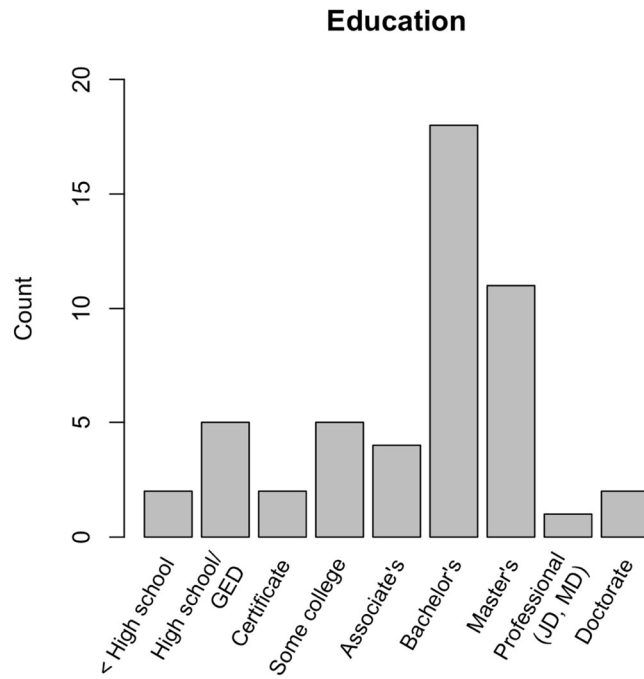

Supplement: Supplementary file 30 [file 1]
